# Supplementary material for: Enhancement of Transcription by a Splicing-Competent Intron Is Dependent on Promoter Directionality
Source: PubMed Central journal article supplement (PMC4859611; doi:10.1371/journal.pgen.1006047), 2016-05-06

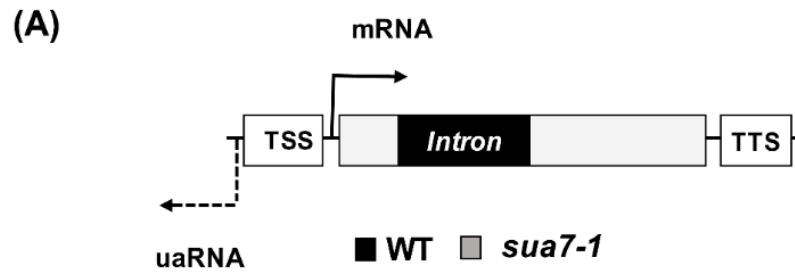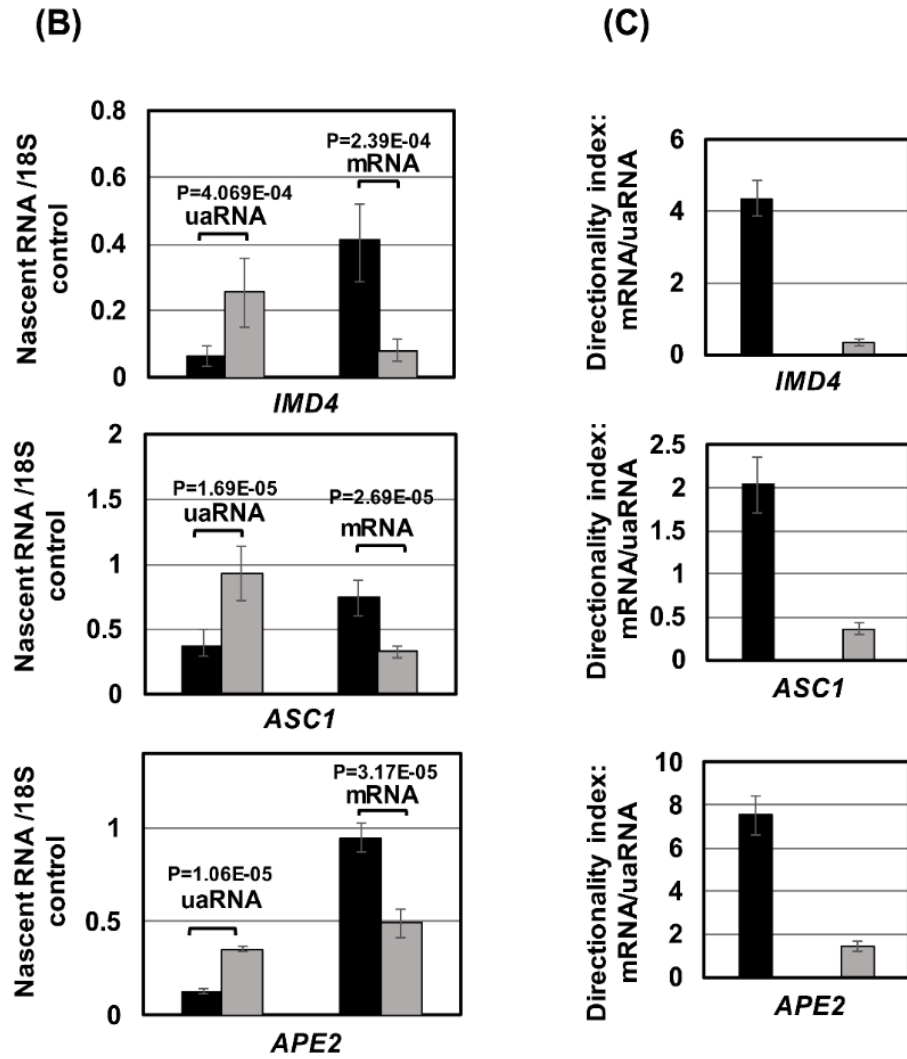

Supplement: pgen.1006047.s005.pdf [file pgen.1006047.s005.pdf]
