# Supplementary material for: Enhancement of Transcription by a Splicing-Competent Intron Is Dependent on Promoter Directionality
Source: PubMed Central journal article supplement (PMC4859611; doi:10.1371/journal.pgen.1006047), 2016-05-06
Supplement: pgen.1006047.s006.pdf [file pgen.1006047.s006.pdf]

**S1\_Table**

| <u>Strain</u> | <u>Genotype</u>                                                                                   | <u>Reference</u> |
|---------------|---------------------------------------------------------------------------------------------------|------------------|
| BY4733        | <i>MATa his3Δ200 trp1Δ63 leu2Δ0 met15Δ0 ura3Δ0</i>                                                |                  |
| NEA6          | <i>MATa his3Δ200 trp1Δ63 leu2Δ0 met15Δ0 ura3Δ0 IMD4</i><br><i>Without intron</i>                  | This study       |
| NEA10         | <i>MATa his3Δ200 trp1Δ63 leu2Δ0 met15Δ0 ura3Δ0</i><br><i>IMD4::Act1 intron</i>                    | This study       |
| AA6           | <i>MATa his3Δ200 trp1Δ63 leu2Δ0 met15Δ0 ura3Δ0 ASC1</i><br><i>Without intron</i>                  | This study       |
| HG3           | <i>MATa his3Δ200 trp1Δ63 leu2Δ0 met15Δ0 ura3Δ0 APE2</i><br><i>Without intron</i>                  | This study       |
| NEA12         | <i>MATa his3Δ200 trp1Δ63 leu2Δ0 met15Δ0 ura3Δ0 IMD4::</i><br><i>3'SS (CT→GC) intron</i>           | This study       |
| NEA13         | <i>MATa his3Δ200 trp1Δ63 leu2Δ0 met15Δ0 ura3Δ0 IMD4</i><br><i>Without intron, RNA15-TAP::TRP1</i> | This study       |
| ANN1          | <i>MATa his3Δ200 leu2Δ0 met15Δ0 ura3Δ0 IMD4</i><br><i>, NAB3-TAP::TRP1</i>                        | This study       |
| ANN2          | <i>MATa his3Δ200 trp1Δ63 leu2Δ0 met15Δ0 ura3Δ0 IMD4</i><br><i>Without intron, NAB3-TAP::TRP1</i>  | This study       |
| ANN3          | <i>MATa his3Δ200 trp1Δ63 leu2Δ0 met15Δ0 ura3Δ0 IMD4</i><br><i>Without intron, RAT1-TAP::TRP1</i>  | This study       |
| ZD7           | <i>MATa his3Δ200 trp1Δ63 leu2Δ0 met15Δ0 ura3Δ0, RAT1-</i><br><i>TAP::TRP1</i>                     | This study       |
| KMD1          | <i>MATa his3Δ200 trp1Δ63 leu2Δ0 met15Δ0 ura3Δ0 ASC1</i><br><i>Without intron, RAT1-TAP::URA3</i>  | This study       |
| ANN4          | <i>MATa his3Δ200 trp1Δ63 leu2Δ0 met15Δ0 ura3Δ0 IMD4</i><br><i>Without intron, PTA1-HA::HIS3</i>   | This study       |
| SAM72         | <i>MATa his3Δ200 trp1Δ63 leu2Δ0 met15Δ0 ura3Δ0 ASC1</i><br><i>without intron, RNA15-TAP::URA3</i> | This study       |

|         |                                                                                                  |                                 |
|---------|--------------------------------------------------------------------------------------------------|---------------------------------|
| KMD2    | <i>MATa his3Δ200 trp1Δ63 leu2Δ0 met15Δ0 ura3Δ0 ASC1 without intron, RNA15-TAP::URA3</i>          | This study                      |
| NEA17   | <i>MATa his3Δ200 trp1Δ63 leu2Δ0 met15Δ0 ura3Δ0 IMD4:: 5'SS (GT→CA) intron</i>                    | This study                      |
| KMD3    | <i>MATa his3Δ200 trp1Δ63 leu2Δ0 met15Δ0 ura3Δ0 ASC1 without intron, PTA1-HA::HIS3</i>            | This study                      |
| KMD4    | <i>MATa his3Δ200 trp1Δ63 leu2Δ0 met15Δ0 ura3Δ0 ASC1 without intron, NAB3-TAP::URA3</i>           | This study                      |
| AS1     | <i>MATa his3Δ200 trp1Δ63 leu2Δ0 met15Δ0 ura3Δ0 sua7-1</i>                                        | This study                      |
| NEA19   | <i>MATa his3Δ200 trp1Δ63 leu2Δ0 met15Δ0 ura3Δ0 sua7-1, PTA1-HA::HIS3</i>                         | This study                      |
| NEA20   | <i>MATa his3Δ200 trp1Δ63 leu2Δ0 met15Δ0 ura3Δ0 sua7-1, RAT1-TAP::TRP1</i>                        | This study                      |
| KMD5    | <i>MATa his3Δ200 trp1Δ63 leu2Δ0 met15Δ0 ura3Δ0 sua7-1, RNA15-TAP::TRP1</i>                       | This study                      |
| ANN5    | <i>MATa his3Δ200 trp1Δ63 leu2Δ0 met15Δ0 ura3Δ0 IMD4:: 5' SS (GT→CA) intron, PTA1-HA::HIS3</i>    | This study                      |
| ANN6    | <i>MATa his3Δ200 trp1Δ63 leu2Δ0 met15Δ0 ura3Δ0 IMD4:: 3' SS (CT→GC) intron, PTA1-HA::KANMX</i>   | This study                      |
| SAM51   | <i>MATa his3Δ200 trp1Δ63 leu2Δ0 met15Δ0 ura3Δ0, RNA15-MYC</i>                                    | This study                      |
| KMD7    | <i>MATa his3Δ200 trp1Δ63 leu2Δ0 met15Δ0 ura3Δ0 IMD4:: 5' SS (GT→CA) intron, RNA15-MYC::KANMX</i> | This study                      |
| KMD8    | <i>MATa his3Δ200 trp1Δ63 leu2Δ0 met15Δ0 ura3Δ0 IMD4:: 3' SS (CT→GC) intron, RNA5-MYC::KANMX</i>  | This study                      |
| FY23    | <i>MATa ura3-52 trp1D63 leu2D1</i>                                                               | Winston et al. (1)              |
| rna15-2 | <i>MATa ura3-1 trp1-1 ade2-1 leu2-3,112 his3-11,15</i>                                           | Minvielle-Sebastia L et al. (2) |

|       |                                                                      |                                 |
|-------|----------------------------------------------------------------------|---------------------------------|
| XHy23 | <i>Pta1-degron construct: CUP1p-Ub-Arg-DHFRts-HA-PTA1--<br/>URA3</i> | <i>Krishnamurthy et al. (3)</i> |
|-------|----------------------------------------------------------------------|---------------------------------|

### References:

1. Madison JM, Winston F. Evidence that Spt3 functionally interacts with Mot1, TFIIA, and TATA-binding protein to confer promoter-specific transcriptional control in *Saccharomyces cerevisiae*. *Mol Cell Biol.* 1997;17(1):287-95.
2. Minvielle-Sebastia L, Winsor B, Bonneaud N, Lacroute F. Mutations in the yeast RNA14 and RNA15 genes result in an abnormal mRNA decay rate; sequence analysis reveals an RNA-binding domain in the RNA15 protein. *Mol Cell Biol.* 1991;11(6):3075-87.
3. Krishnamurthy S, He X, Reyes-Reyes M, Moore C, Hampsey M. Ssu72 Is an RNA polymerase II CTD phosphatase. *Mol Cell.* 2004;14(3):387-94.
