# Supplementary material for: Enhancement of Transcription by a Splicing-Competent Intron Is Dependent on Promoter Directionality
Source: PubMed Central journal article supplement (PMC4859611; doi:10.1371/journal.pgen.1006047), 2016-05-06
Supplement: pgen.1006047.s007.pdf [file pgen.1006047.s007.pdf]

## S2\_Table

### ChIP Primers

| <i>Name</i>   | <i>Sequence</i>             |
|---------------|-----------------------------|
| <i>IMD4 A</i> | GCCATATAAATATCAGTTGAGAATCC  |
|               | GTATGTCTTCAAATGTTCTAAAGCC   |
| <i>IMD4 B</i> | AGTTTGGTTTCTCTGGCTTCC       |
|               | GATCACAGTCAGTAGAACGAAAGTT   |
| <i>IMD4 C</i> | AACTTTCGTTCTACTGACTGTGATC   |
|               | CTCAACTTTATGAAGACTGAAGAAAT  |
| <i>IMD4 D</i> | ATTTGATGAAGAATCAAACACTACCC  |
|               | AAATCTGGGAAAGTTTCTTTAATCC   |
| <i>IMD4 E</i> | GAGTAAGCATCCATAGATATTTAAAAG |
|               | CGAACTGAAAAACGAAAATAAGAA    |
| <i>ASC1 A</i> | GACTGCTCCTTTGGTTTTCC        |
|               | GGTTGACCAGCAGAAGGAGCC       |
| <i>ASC1 B</i> | GCTTCCATGATTATCTCTGGT       |
|               | CTCGATTGTCATCATATTCTATCA    |
| <i>ASC1 C</i> | CTTCTCTTTATCCGTTATGTCAAATG  |
|               | TTCTTAGCAGCCAAGTTCCACA      |
| <i>ASC1 D</i> | TTGGCTGCTAAGAAGGCTATG       |
|               | CCAAGCCAAAGAAACAGCAT        |
| <i>ASC1 E</i> | GTTTCTTTGGCTTGGTCTGC        |
|               | GCCAAGGAGACTGAATTTAATG      |

cDNA primers for TRO and Strand-specific RT PCR:

|                 |                             |
|-----------------|-----------------------------|
| <i>Oligo dT</i> | TTTTTTTTTTTTTTTTTTTTTTTTTTT |
| <i>18S</i>      | GACGGAGTTTCACAAGATTACC      |
| <i>IMD4 UP1</i> | GATTCAAATCATGCTTGGCTC       |

|                 |                               |
|-----------------|-------------------------------|
| <i>ASC1 UP1</i> | ACTGGTAATACTCATCACCATACTTATAT |
| <i>APE2 UP1</i> | GCGGCAAGATAGTAAGATAGCA        |

Upstream antisense RT PCR primers:

|                |                           |
|----------------|---------------------------|
| <i>IMD4 UP</i> | CGCATTTCATCTCTTTTC        |
|                | TTTGTTAGGTTTCTTCAAAGCTATG |
| <i>ASC1 UP</i> | GTGCTTCTCCAGCGAAAGTC      |
|                | CACAATTAAGGAATAGCCCAA     |
| <i>APE2 UP</i> | TGAACCTTACAGCGCCTT        |
|                | GTCTAAGAGCACATTAGATCGAA   |

Gene specific (mRNA) RT primer:

|                |                          |
|----------------|--------------------------|
| <i>IMD4 A1</i> | TGTTGTCAAGAGCGGATTTG     |
| <i>IMD4 A2</i> | AATCTGGGAAAGTTTCTTTAATCC |
| <i>ASC1 A1</i> | TTGGCTGCTAAGAAGGCTATG    |
| <i>ASC1 A2</i> | CGGTAGCAGTGGCAGCAG       |
| <i>APE2 A1</i> | CCAATTGTTTCGGTGGCTATT    |
| <i>APE2 A2</i> | ACAAATCTTGGGGGAGTTAATT   |
| 18S F          | GGAATAATAGAATAGGACGTTTGG |
| 18s R          | GTTAAGGTCTCGTTCGTTATCG   |

CCC primer:

|                |                              |
|----------------|------------------------------|
| <i>IMD4 P1</i> | AGAGTTTTTCACATTAGGGCTGC      |
| <i>IMD4 T1</i> | CTTATTGAAGTATGTACAGTGGAAATAG |
| <i>IMD4 F1</i> | TGGATTACAAAAGGCTTTAGAAC      |
| <i>IMD4 R1</i> | CTTCAGTGACTGTGTCCATAGGAG     |
| <i>ASC1 P1</i> | AGGAAAACCAAAGGAGCAGTC        |
| <i>ASC1 T1</i> | TGGCAAGTTATGACTGCTAACTAAG    |

|                |                           |
|----------------|---------------------------|
| <i>ASC1</i> F1 | TTGGCTGCTAAGAAGGCTATG     |
| <i>ASC1</i> R1 | CGGTAGCAGTGGCAGCAG        |
| <i>APE2</i> P1 | CAGTTTAGAAGTTTACCAAACC    |
| <i>APE2</i> T1 | ATTTTGCCTTTTTATATAGTCAAGT |
| <i>APE2</i> F1 | ATAATATGGCTGGCTTTTACA     |
| <i>APE2</i> R1 | TAAGTTGACATTTTAGGGGTC     |
